# Supplementary material for: Monoacylglycerol lipase promotes progression of hepatocellular carcinoma via NF-κB-mediated epithelial-mesenchymal transition
Source: Springer Nature journal article supplement (doi:10.1186/s13045-016-0361-3), 2016-11-24

## Additional file 1

### Supplementary Table S1. Primers used in the study

| Primers for Real-time PCR |   |                           |
|---------------------------|---|---------------------------|
| Protein                   |   | Sequence (5'→ . 3')       |
| MAGL                      | F | ATGGTAGAGTTCGCGCCCTTGTTT  |
|                           | R | TCATCATAACTCCAAGTGCTGGTCA |
| E-cadherin                | F | TTGCTACTGGAACAGGGACAC     |
|                           | R | CCCGTGTGTTAGTTCTGCTGT     |
| N-cadherin                | F | TTATCCTTGTGCTGATGTTTGTG   |
|                           | R | TCTTCTTCTCCTCCACCTTCTTC   |
| Vimentin                  | F | CCTTGACATTGAGATTGCCACCTA  |
|                           | R | TCATCGTGATGCTGAGAAGTTTCG  |
| Snail                     | F | TCCAGAGTTTACCTTCCAGCA     |
|                           | R | CTTTCCCACTGTCTACTCTG      |
| Twist                     | F | GTCCGCAGTCTTACGAGGAG      |
|                           | R | GTCTGAATCTTGCTCAGCTTGTC   |
| β-actin                   | F | CTGAGGACAAGCCACAAGATTA    |
|                           | R | ATCCACCAGAGTGAAAAGAACG    |

### Supplementary Table S2. Antibodies used in the research

| Protein    | Usage   | Antibody       |
|------------|---------|----------------|
| MAGL       | WB, IHC | Ab77398, Abcam |
| E-cadherin | WB, IHC | 3195,CST       |
| N-cadherin | WB, IHC | 14215,CST      |
| Vimentin   | WB, IHC | 5741,CST       |
| Snail      | WB, IHC | 3879,CST       |
| Twist      | WB, IHC | ab50887, Abcam |
| NF-κB p65  | WB, IHC | 8242,CST       |
| β-actin    | WB, IHC | 3700,CST       |

Abbreviations: WB, western blot; IHC, immunohistochemistry

**Supplementary Table S3. Sequences of shRNA targeting MAGL and NF-κB p65**

| Sequence (5' → 3') |                                                                                                                                        |
|--------------------|----------------------------------------------------------------------------------------------------------------------------------------|
| MAGL-shRNA1        | GCTCGGATGCTGATGGGGCTGGACCTGCTGGTGTTCGGGAAA<br>GCAATAGTGAAGCCACAGATGTATTGCTTTCCCCACGACCAT<br>GTTGGCCACGGACAGAGCGAAGGGGAGAGGATGGTAGTGTCT |
| MAGL-shRNA2        | GCTCGGATGCTGATGGGGCTGGACCTGCTGGTGTAAATTAGT<br>GAAGCCACAGATGTAATTTATCGCCCACGACCATGTTGGCCAC<br>GGACAGAGCGAAGGGGAGAGGATGGTAGTGTCT         |
| NF-κB p65-shRNA1   | TGCTGTTGACAGTGAGCGCGGAATCCAGTGTGTGAAGAATAG<br>TGAAGCCACAGATGTATTCTTCACACACTGGATTCCCATGCCTA<br>CTGCCTCGGA                               |
| NF-κB p65-shRNA2   | TGCTGTTGACAGTGAGCGACTGAGTCAGATCAGCTCCTAATAG<br>TGAAGCCACAGATGTATTAGGAGCTGATCTGACTCAGCTGCCT<br>ACTGCCTCGGA                              |

**Supplementary Figure S1**

**Representative images of MAGL immunohistochemic staining.** MAGL expression at low or high levels were detected in HCC samples which includes both tumor and peritumor tissues (×200). Positive cells were stained brown. Nucleus were stained blue with hematoxylin. The frozen sections of HCC samples generated from MAGL low or high expression were also stained with H&E.

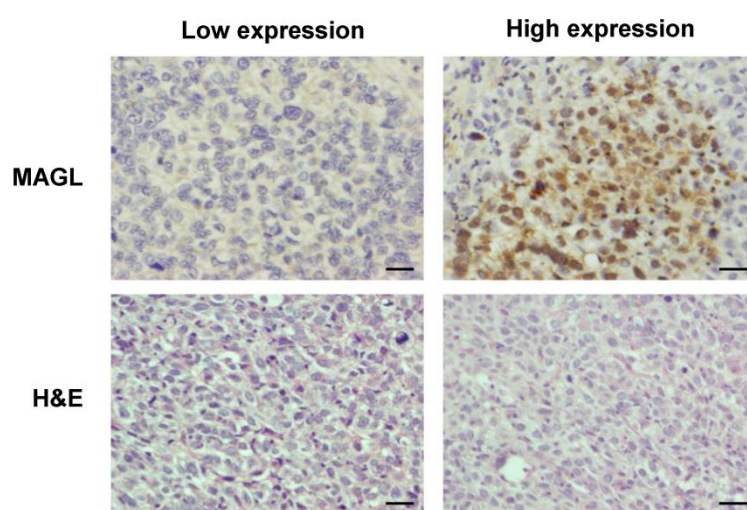

### Supplementary Figure S2

**qRT-PCR assay of MAGL mRNA expression in 27 tumor samples.** The average mRNA level of MAGL was significantly higher in tumor tissues than in paired peritumor tissues.

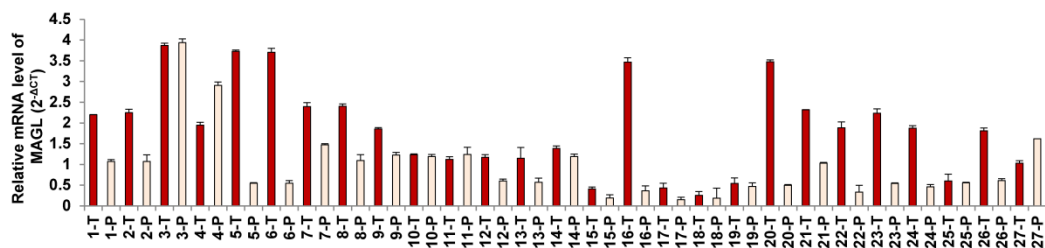

### Supplementary Figure S3

**The regulating effects of MAGL on NF-κB p65, N-cadherin, and Snail expression in HCCLM3 cells with different MAGL expression levels.** Western blot assay showed that the reduced protein expression of NF-κB p65, N-cadherin, and Snail in HCCLM3-shMAGL cells could obviously be reversed when the MAGL expression was markedly up-regulated, which also accompanied by down-regulation of E-cadherin expression. Abbreviation: OE, overexpression.

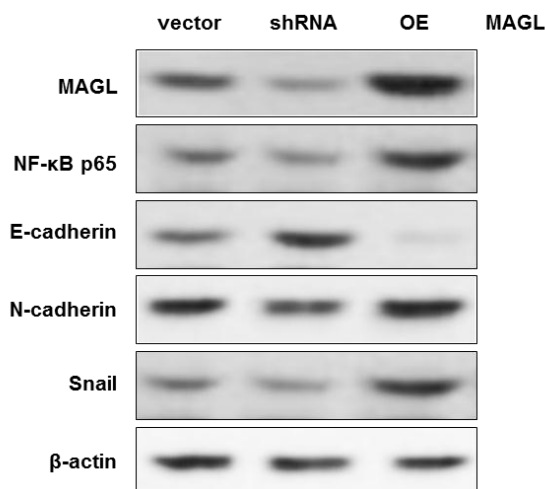

Supplement: MOESM1 [file 11100408]
